# Supplementary material for: Characterisation of Genome-Wide Association Epistasis Signals for Serum Uric Acid in Human Population Isolates
Source: PubMed Central journal article supplement (PMC3158795; doi:10.1371/journal.pone.0023836), 2011-08-19
Supplement: pone.0023836.s005.pdf [file pone.0023836.s005.pdf]

Table S1: *SLC2A9* involved epistatic pairs ( $-\log_{10}P_{\text{pair}} > 6.5$  and  $-\log_{10}P_{\text{int}} > 6.5$ ) in MICROS

| SNP <sub>1</sub> | chr <sub>1</sub> | gene <sub>1</sub> | SNP <sub>2</sub> | chr <sub>2</sub> | gene <sub>2</sub> | P <sub>pair</sub> | P <sub>int</sub> | MGC |
|------------------|------------------|-------------------|------------------|------------------|-------------------|-------------------|------------------|-----|
| rs12130085       | 1                | <i>NFIA</i>       | rs13129697       | 4                | <i>SLC2A9</i>     | 13.86             | 6.54             | 2   |
| rs12130085       | 1                | <i>NFIA</i>       | rs737267         | 4                | <i>SLC2A9</i>     | 16.38             | 8.2              | 2   |
| rs12130085       | 1                | <i>NFIA</i>       | rs13131257       | 4                | <i>SLC2A9</i>     | 13.8              | 6.75             | 2   |
| rs1464258        | 4                | <i>SLC2A9</i>     | rs838795         | 5                | <i>C5orf50</i>    | 7.04              | 7.08             | 17  |
| rs733175         | 4                | <i>SLC2A9</i>     | rs1173723        | 5                | (-)               | 10.45             | 6.8              | 6   |
| rs733175         | 4                | <i>SLC2A9</i>     | rs1818116        | 5                | (-)               | 11.43             | 7.27             | 7   |
| rs4697895        | 4                | <i>SLC2A9</i>     | rs4747887        | 10               | <i>PFKFB3</i>     | 7.16              | 6.59             | 15  |
| rs4697895        | 4                | <i>SLC2A9</i>     | rs7099083        | 10               | <i>PFKFB3</i>     | 7.35              | 6.78             | 15  |
| rs1107710        | 4                | <i>SLC2A9</i>     | rs7099083        | 10               | <i>PFKFB3</i>     | 6.66              | 6.78             | 11  |
| rs1107710        | 4                | <i>SLC2A9</i>     | rs12281918       | 11               | <i>FLI1</i>       | 7.66              | 6.63             | 2   |
| rs4697902        | 4                | <i>SLC2A9</i>     | rs2374532        | 12               | (-)               | 7.16              | 6.56             | 1   |
| rs4697895        | 4                | <i>SLC2A9</i>     | rs1887589        | 13               | (-)               | 8.45              | 7.33             | 2   |
| rs4697902        | 4                | <i>SLC2A9</i>     | rs1887589        | 13               | (-)               | 7.39              | 6.67             | 2   |
| rs737267         | 4                | <i>SLC2A9</i>     | rs9316212        | 13               | <i>ESRRAP2</i>    | 16.21             | 7.97             | 2   |
| rs13131257       | 4                | <i>SLC2A9</i>     | rs9316212        | 13               | <i>ESRRAP2</i>    | 14.98             | 7.88             | 2   |
| rs2867394        | 4                | <i>SLC2A9</i>     | rs7141105        | 14               | <i>SLC8A3</i>     | 8.06              | 6.58             | 4   |
| rs733175         | 4                | <i>SLC2A9</i>     | rs137180         | 22               | <i>SEZ6L</i>      | 10.09             | 6.58             | 4   |

SNP<sub>1</sub> (SNP<sub>2</sub>): the first (second) SNP name;

chr<sub>1</sub> (chr<sub>2</sub>): the chromosome where SNP<sub>1</sub> (SNP<sub>2</sub>) locates

gene<sub>1</sub> (gene<sub>2</sub>): symbol of the gene annotated by SNP<sub>1</sub> (SNP<sub>2</sub>);

P<sub>pair</sub>:  $-\log_{10}$  P value of the whole pair test;

P<sub>int</sub>:  $-\log_{10}$  P value of the interaction test;

MGC: count of number of individuals in the minor joint genotype class

(-): no gene annotated
