# Supplementary material for: Characterisation of Genome-Wide Association Epistasis Signals for Serum Uric Acid in Human Population Isolates
Source: PubMed Central journal article supplement (PMC3158795; doi:10.1371/journal.pone.0023836), 2011-08-19
Supplement: pone.0023836.s006.pdf [file pone.0023836.s006.pdf]

Table S2: Epistatic genes in the replicated GO terms shared by the MICROS and CROATIAN populations

| Symbol          | Region   | Gene Name                                                                                      | GWA information and disease associated*                                                              |
|-----------------|----------|------------------------------------------------------------------------------------------------|------------------------------------------------------------------------------------------------------|
| <i>PLXNA2</i>   | 1q32.2   | plexin a2                                                                                      | Cardiac hypertrophy                                                                                  |
| <i>RGS7</i>     | 1q23.1   | regulator of g-protein signaling 7                                                             | Multiple sclerosis                                                                                   |
| <i>UBR4</i>     | 1p36.13  | ubiquitin protein ligase e3 component n-recognin 4                                             | (-)                                                                                                  |
| <i>EPHA4</i>    | 2q36.1   | eph receptor a4                                                                                | Alzheimer's Disease, mild cognitive impairment                                                       |
| <i>GLI2</i>     | 2q14.2   | gli family zinc finger 2                                                                       | Erectile dysfunction and prostate cancer treatment                                                   |
| <i>PAR3B</i>    | 2q33.3   | par-3 partitioning defective 3 homolog b (c. elegans)                                          | Knee osteoarthritis                                                                                  |
| <i>SLC8A1</i>   | 2p23-p22 | solute carrier family 8 (sodium/calcium exchanger), member 1                                   | (-)                                                                                                  |
| <i>CHL1</i>     | 3p26.3   | cell adhesion molecule with homology to l1cam (close homolog of l1)                            | Scoliosis; lipid-lowering response to statins                                                        |
| <i>CNTN4</i>    | 3p26.3   | contactin 4                                                                                    | Alzheimer's disease; Amyotrophic lateral sclerosis; Blood pressure; Acenocoumarol maintenance dosage |
| <i>ERC2</i>     | 3p14.3   | elks/rab6-interacting/cast family member 2                                                     | Bipolar disorder and schizophrenia; Hip geometry                                                     |
| <i>GRM7</i>     | 3p26.1   | glutamate receptor, metabotropic 7                                                             | Neuroticism Anxiety; Bipolar disorder; Major depressive disorder; Panic disorder                     |
| <i>HRH1</i>     | 3p25     | histamine receptor h1                                                                          | (-)                                                                                                  |
| <i>PLCH1</i>    | 3q25.31  | phospholipase c, eta 1                                                                         | (-)                                                                                                  |
| <i>ROBO1</i>    | 3p12.3   | roundabout, axon guidance receptor, homolog 1 (drosophila)                                     | Brain imaging in Schizophrenia                                                                       |
| <i>ROBO2</i>    | 3p12.3   | roundabout, axon guidance receptor, homolog 2 (drosophila)                                     | Brain imaging in Schizophrenia                                                                       |
| <i>SRGAP3</i>   | 3p25.3   | slit-robo rho gtpase activating protein 3                                                      | (-)                                                                                                  |
| <i>ARHGAP24</i> | 4q21.23  | rho gtpase activating protein 24                                                               | Electrocardiographic traits                                                                          |
| <i>DCHS2</i>    | 4q31.3   | dachsous 2 (drosophila)                                                                        | (-)                                                                                                  |
| <i>KCNIP4</i>   | 4p15.2   | kv channel interacting protein 4                                                               | Suicidal ideation                                                                                    |
| <i>SLC2A9</i>   | 4p16.1   | solute carrier family 2 (facilitated glucose transporter), member 9                            | Serum urate; Serum uric acid                                                                         |
| <i>CAMK4</i>    | 5q22.1   | calcium/calmodulin-dependent protein kinase iv                                                 | blood pressure and arterial stiffness                                                                |
| <i>CDH12</i>    | 5p14.3   | cadherin 12, type 2 (n-cadherin 2)                                                             | Waist circumference                                                                                  |
| <i>CTNND2</i>   | 5p15.2   | catenin (cadherin-associated protein), delta 2 (neural plakophilin-related arm-repeat protein) | Myopia                                                                                               |
| <i>ENC1</i>     | 5q13     | ectodermal-neural cortex 1 (with btb-like domain)                                              | (-)                                                                                                  |
| <i>ODZ2</i>     | 5q34     | odz, odd oz/ten-m homolog 2 (drosophila)                                                       | (-)                                                                                                  |
| <i>BAI3</i>     | 6q13     | brain-specific angiogenesis inhibitor 3                                                        | Lipid-lowering response to statins                                                                   |
| <i>GRIK2</i>    | 6q16.3   | glutamate receptor, ionotropic, kainate 2                                                      | Cardiac hypertrophy; Biochemical measures                                                            |
| <i>IGF2R</i>    | 6q25.3   | insulin-like growth factor 2 receptor                                                          | Multiple sclerosis                                                                                   |
| <i>NEDD9</i>    | 6p25-p24 | neural precursor cell expressed, developmentally down-regulated 9                              | (-)                                                                                                  |
| <i>NKAIN2</i>   | 6q22.31  | na+/k+ transporting atpase interacting 2                                                       | Neuroticism                                                                                          |
| <i>RPS6KA2</i>  | 6q27     | ribosomal protein s6 kinase, 90kda, polypeptide 2                                              | (-)                                                                                                  |
| <i>SYNE1</i>    | 6q25.2   | spectrin repeat containing, nuclear envelope 1                                                 | Bipolar disorder and major depressive disorder; blood pressure and arterial stiffness                |
| <i>UNC93A</i>   | 6q27     | unc-93 homolog a (c. elegans)                                                                  | (-)                                                                                                  |
| <i>CHRM2</i>    | 7q31-q35 | cholinergic receptor, muscarinic 2                                                             | (-)                                                                                                  |
| <i>CNTNAP2</i>  | 7q35     | contactin associated protein-like 2                                                            | Bipolar disorder and schizophrenia; Bone mineral density; Autism                                     |
| <i>POU6F2</i>   | 7p14.1   | pou class 6 homeobox 2                                                                         | Autism                                                                                               |
| <i>ADCY8</i>    | 8q24.22  | adenylate cyclase 8 (brain)                                                                    | Alzheimer's disease                                                                                  |

|                |           |                                                                          |                                                                                                     |
|----------------|-----------|--------------------------------------------------------------------------|-----------------------------------------------------------------------------------------------------|
| <i>DLC1</i>    | 8p22      | deleted in liver cancer 1                                                | (-)                                                                                                 |
| <i>NRG1</i>    | 8p12      | neuregulin 1                                                             | Hirschsprung's disease; Hip geometry                                                                |
| <i>DIRAS2</i>  | 9q22.2    | diras family, gtp-binding ras-like 2                                     | Cognitive test performance; Protein quantitative trait loci                                         |
| <i>GNA14</i>   | 9q21      | guanine nucleotide binding protein (g protein), alpha 14                 | (-)                                                                                                 |
| <i>LPPR1</i>   | 9q31.1    | lipid phosphate phosphatase-related protein type 1                       | (-)                                                                                                 |
| <i>NTRK2</i>   | 9q22.1    | neurotrophic tyrosine kinase, receptor, type 2                           | (-)                                                                                                 |
| <i>PCSK5</i>   | 9q21.13   | proprotein convertase subtilisin/kexin type 5                            | Alzheimer's disease                                                                                 |
| <i>PTPRD</i>   | 9p24.1    | protein tyrosine phosphatase, receptor type, d                           | Type 2 diabetes; Platelet aggregation; Partial epilepsies; Restless legs syndrome                   |
| <i>SH3GL2</i>  | 9p22.2    | sh3-domain grb2-like 2                                                   | Cognitive performance; Heart failure; Multiple sclerosis                                            |
| <i>COL13A1</i> | 10q22.1   | collagen, type xiii, alpha 1                                             | Non-alcoholic fatty liver disease                                                                   |
| <i>CUBN</i>    | 10p13     | cubilin (intrinsic factor-cobalamin receptor)                            | Urinary albumin excretion; Alzheimer's disease; Folate pathway vitamin levels                       |
| <i>DNMBP</i>   | 10q24.2   | dynamamin binding protein                                                | (-)                                                                                                 |
| <i>DOCK1</i>   | 10q26.13  | dedicator of cytokinesis 1                                               | (-)                                                                                                 |
| <i>GRID1</i>   | 10q23.1   | glutamate receptor, ionotropic, delta 1                                  | Cardiac structure and function                                                                      |
| <i>PRKG1</i>   | 10q11.2   | protein kinase, cgmp-dependent, type i                                   | (-)                                                                                                 |
| <i>SORCS1</i>  | 10q23-q25 | sortilin-related vps10 domain containing receptor 1                      | Diabetes; Alzheimer's disease;                                                                      |
| <i>CNTN5</i>   | 11q22.1   | contactin 5                                                              | Bipolar disorder and schizophrenia; Atrial fibrillation; brain aging                                |
| <i>DLG2</i>    | 11q14.1   | discs, large homolog 2 (drosophila)                                      | Parkinson's disease; Protein quantitative trait loci                                                |
| <i>KCNJ5</i>   | 11q24     | potassium inwardly-rectifying channel, subfamily j, member 5             | (-)                                                                                                 |
| <i>KIRREL3</i> | 11q24.2   | kin of irre like 3 (drosophila)                                          | Response to antipsychotic treatment; Attention deficit hyperactivity disorder and conduct disorder; |
| <i>OPCML</i>   | 11q25     | opioid binding protein/cell adhesion molecule-like                       | (-)                                                                                                 |
| <i>ZBTB16</i>  | 11q23.2   | zinc finger and btb domain containing 16                                 | Conduct disorder                                                                                    |
| <i>ANKS1B</i>  | 12q23.1   | ankyrin repeat and sterile alpha motif domain containing 1b              | Schizophrenia; body mass index; waist circumference                                                 |
| <i>CD69</i>    | 12p13.31  | cd69 molecule                                                            | Type 1 diabetes                                                                                     |
| <i>NINJ2</i>   | 12p13.33  | ninjurin 2                                                               | Stroke                                                                                              |
| <i>PDE3A</i>   | 12p12.2   | phosphodiesterase 3a, cgmp-inhibited                                     | Cardiovascular disease; Male infertility; Height                                                    |
| <i>GPC5</i>    | 13q31.3   | glypican 5                                                               | Multiple sclerosis; Serum metabolites; Height; Lung cancer;                                         |
| <i>GPC6</i>    | 13q31.3   | glypican 6                                                               | Neuroticism; Attention deficit hyperactivity disorder; Tonometry; Kidney aging                      |
| <i>MCF2L</i>   | 13q34     | mcf.2 cell line derived transforming sequence-like                       | Hemostatic factors for cardiovascular disease                                                       |
| <i>PCDH9</i>   | 13q21.32  | protocadherin 9                                                          | (-)                                                                                                 |
| <i>PTGER2</i>  | 14q22     | prostaglandin e receptor 2 (subtype ep2), 53kda                          | (-)                                                                                                 |
| <i>RORA</i>    | 15q22.2   | rar-related orphan receptor a                                            | Cardiovascular disease; Alzheimer's disease; Age at menarche; Asthma; Depression                    |
| <i>GRIN2A</i>  | 16p13.2   | glutamate receptor, ionotropic, n-methyl d-aspartate 2a                  | Smoking; Alzheimer's disease; Amyotrophic lateral sclerosis                                         |
| <i>MYO1D</i>   | 17q11.2   | myosin id                                                                | Pancreatic cancer; Autism                                                                           |
| <i>PRKCA</i>   | 17q24.2   | protein kinase c, alpha                                                  | Cardiac ventricular conduction                                                                      |
| <i>MBP</i>     | 18q23     | myelin basic protein                                                     | (-)                                                                                                 |
| <i>RNF138</i>  | 18q12.1   | ring finger protein 138                                                  | (-)                                                                                                 |
| <i>CACNA1A</i> | 19p13     | calcium channel, voltage-dependent, p/q type, alpha 1a subunit           | (-)                                                                                                 |
| <i>MED16</i>   | 19p13.3   | mediator complex subunit 16                                              | (-)                                                                                                 |
| <i>PLCB1</i>   | 20p12.3   | phospholipase c, beta 1 (phosphoinositide-specific)                      | Cognitive test performance                                                                          |
| <i>PREX1</i>   | 20q13.13  | phosphatidylinositol-3,4,5-trisphosphate-dependent rac exchange factor 1 | Blood pressure and arterial stiffness; Type 2 diabetes                                              |

|               |         |                                                |                                                                                   |
|---------------|---------|------------------------------------------------|-----------------------------------------------------------------------------------|
| <i>RSPO4</i>  | 20p13   | r-spondin family, member 4                     | (-)                                                                               |
| <i>AGPAT3</i> | 21q22.3 | 1-acylglycerol-3-phosphate o-acyltransferase 3 | (-)                                                                               |
| <i>GRIK1</i>  | 21q21.3 | glutamate receptor, ionotropic, kainate 1      | Lipid-lowering response to statins; Hyperactive-impulsive symptoms; Breast cancer |
| <i>MYH9</i>   | 22q12.3 | myosin, heavy chain 9, non-muscle              | Glomerulosclerosis; End-stage renal disease; Optic disc size                      |

---

(-): no information

\*: GWA information extracted from the NHGRI GWAS Catalog (<http://www.genome.gov/gwastudies/>)
