# Supplementary material for: Characterisation of Genome-Wide Association Epistasis Signals for Serum Uric Acid in Human Population Isolates
Source: PubMed Central journal article supplement (PMC3158795; doi:10.1371/journal.pone.0023836), 2011-08-19
Supplement: pone.0023836.s007.pdf [file pone.0023836.s007.pdf]

Table S3: Epistatic pairs with at least one shared GO gene and replicated in MICROS and CROATIAN

| SNP <sub>1</sub> | chr <sub>1</sub> | gene <sub>1</sub> | SNP <sub>2</sub> | chr <sub>2</sub> | gene <sub>2</sub> | P <sub>pair</sub> | P <sub>int</sub> | MGC | population |
|------------------|------------------|-------------------|------------------|------------------|-------------------|-------------------|------------------|-----|------------|
| rs3767511        | 1                | CACNA1S           | rs6449213        | 4                | SLC2A9            | 10.93             | 3.95             | 1   | MICROS     |
| rs3767511        | 1                | CACNA1S           | rs1014290        | 4                | SLC2A9            | 10.14             | 3.58             | 1   | MICROS     |
| rs4915215        | 1                | CACNA1S           | rs1014290        | 4                | SLC2A9            | 15.93             | 3.51             | 23  | CROATIAN   |
| rs12566907       | 1                | DPYD              | rs733175         | 4                | SLC2A9            | 8.34              | 3.93             | 4   | MICROS     |
| rs7548189        | 1                | DPYD              | rs737267         | 4                | SLC2A9            | 12.09             | 3.28             | 5   | MICROS     |
| rs7548189        | 1                | DPYD              | rs13131257       | 4                | SLC2A9            | 10.87             | 3.39             | 4   | MICROS     |
| rs10875051       | 1                | DPYD              | rs4505821        | 4                | SLC2A9            | 7.21              | 3.97             | 4   | CROATIAN   |
| rs12041436       | 1                | DPYD              | rs4505821        | 4                | SLC2A9            | 8.16              | 4.63             | 4   | CROATIAN   |
| rs4415625        | 1                | DPYD              | rs4505821        | 4                | SLC2A9            | 8.08              | 4.5              | 4   | CROATIAN   |
| rs4415625        | 1                | DPYD              | rs6820230        | 4                | SLC2A9            | 7.02              | 5.74             | 4   | CROATIAN   |
| rs827497         | 1                | DPYD              | rs10805346       | 4                | SLC2A9            | 12.52             | 4.04             | 32  | CROATIAN   |
| rs7559750        | 2                | DOCK10            | rs6449213        | 4                | SLC2A9            | 10.68             | 3.55             | 2   | MICROS     |
| rs6436516        | 2                | DOCK10            | rs6449213        | 4                | SLC2A9            | 10.65             | 3.56             | 2   | MICROS     |
| rs921281         | 2                | DOCK10            | rs10805346       | 4                | SLC2A9            | 12.35             | 3.38             | 64  | CROATIAN   |
| rs2303325        | 2                | GALNT14           | rs6449213        | 4                | SLC2A9            | 10.59             | 3.51             | 1   | MICROS     |
| rs12621279       | 2                | GALNT14           | rs13131257       | 4                | SLC2A9            | 13.94             | 3.55             | 13  | CROATIAN   |
| rs720755         | 2                | LRP1B             | rs737267         | 4                | SLC2A9            | 12.05             | 3.56             | 7   | MICROS     |
| rs720755         | 2                | LRP1B             | rs13131257       | 4                | SLC2A9            | 11.14             | 3.76             | 5   | MICROS     |
| rs1949871        | 2                | LRP1B             | rs1014290        | 4                | SLC2A9            | 15.89             | 3.46             | 28  | CROATIAN   |
| rs1880620        | 2                | LRP1B             | rs1014290        | 4                | SLC2A9            | 15.87             | 3.48             | 31  | CROATIAN   |
| rs10490229       | 2                | NRXN1             | rs737267         | 4                | SLC2A9            | 12.41             | 3.98             | 4   | MICROS     |
| rs9750635        | 2                | NRXN1             | rs13131257       | 4                | SLC2A9            | 14.05             | 3.58             | 4   | CROATIAN   |
| rs10185359       | 2                | ZEB2              | rs10805346       | 4                | SLC2A9            | 8.92              | 3.3              | 8   | MICROS     |
| rs7564469        | 2                | ZEB2              | rs733175         | 4                | SLC2A9            | 10.97             | 3.3              | 4   | CROATIAN   |
| rs2318154        | 3                | EPHA6             | rs13131257       | 4                | SLC2A9            | 10.12             | 3.27             | 1   | MICROS     |
| rs1875281        | 3                | EPHA6             | rs10805346       | 4                | SLC2A9            | 11.58             | 3.51             | 17  | CROATIAN   |
| rs17711589       | 3                | ERC2              | rs4447863        | 4                | SLC2A9            | 7.13              | 4.51             | 19  | MICROS     |
| rs815470         | 3                | ERC2              | rs1014290        | 4                | SLC2A9            | 16.89             | 3.63             | 4   | CROATIAN   |
| rs1524966        | 3                | MAGI1             | rs733175         | 4                | SLC2A9            | 7.16              | 3.33             | 2   | MICROS     |
| rs1864509        | 3                | MAGI1             | rs733175         | 4                | SLC2A9            | 7.56              | 3.82             | 9   | MICROS     |
| rs1430416        | 3                | MAGI1             | rs733175         | 4                | SLC2A9            | 7.3               | 3.39             | 8   | MICROS     |
| rs6778911        | 3                | MAGI1             | rs13129697       | 4                | SLC2A9            | 16.3              | 3.53             | 4   | CROATIAN   |
| rs737267         | 4                | SLC2A9            | rs10016365       | 4                | ANK2              | 13.11             | 4.29             | 3   | MICROS     |
| rs733175         | 4                | SLC2A9            | rs1385662        | 4                | ANK2              | 12.14             | 3.57             | 11  | CROATIAN   |
| rs10805346       | 4                | SLC2A9            | rs17013734       | 4                | PHF17             | 8.98              | 3.72             | 8   | MICROS     |
| rs6449213        | 4                | SLC2A9            | rs11933240       | 4                | PHF17             | 14.94             | 3.35             | 7   | CROATIAN   |
| rs13131257       | 4                | SLC2A9            | rs1501776        | 5                | CTNND2            | 11.19             | 4.24             | 15  | MICROS     |
| rs13129697       | 4                | SLC2A9            | rs881675         | 5                | CTNND2            | 16.6              | 3.38             | 7   | CROATIAN   |
| rs13129697       | 4                | SLC2A9            | rs26478          | 5                | CTNND2            | 17.23             | 3.4              | 11  | CROATIAN   |
| rs1014290        | 4                | SLC2A9            | rs881675         | 5                | CTNND2            | 17.03             | 4.44             | 4   | CROATIAN   |
| rs733175         | 4                | SLC2A9            | rs881675         | 5                | CTNND2            | 11.52             | 3.81             | 4   | CROATIAN   |
| rs13129697       | 4                | SLC2A9            | rs7718587        | 5                | PPP2R2B           | 10.89             | 3.55             | 9   | MICROS     |
| rs6449213        | 4                | SLC2A9            | rs974097         | 5                | PPP2R2B           | 11.75             | 3.99             | 1   | MICROS     |
| rs6449213        | 4                | SLC2A9            | rs1663333        | 5                | PPP2R2B           | 11.08             | 3.44             | 1   | MICROS     |
| rs13131257       | 4                | SLC2A9            | rs161039         | 5                | PPP2R2B           | 14.19             | 3.41             | 6   | CROATIAN   |
| rs6449213        | 4                | SLC2A9            | rs161039         | 5                | PPP2R2B           | 15.59             | 3.52             | 6   | CROATIAN   |
| rs1014290        | 4                | SLC2A9            | rs161039         | 5                | PPP2R2B           | 17.26             | 4.46             | 11  | CROATIAN   |

|            |   |        |            |   |          |       |      |    |          |
|------------|---|--------|------------|---|----------|-------|------|----|----------|
| rs733175   | 4 | SLC2A9 | rs161039   | 5 | PPP2R2B  | 12.72 | 4.76 | 8  | CROATIAN |
| rs733175   | 4 | SLC2A9 | rs11748210 | 5 | PPP2R2B  | 10.74 | 3.61 | 20 | CROATIAN |
| rs733175   | 4 | SLC2A9 | rs1368379  | 5 | PPP2R2B  | 12    | 3.89 | 1  | CROATIAN |
| rs10805346 | 4 | SLC2A9 | rs4499954  | 6 | ARHGAP18 | 9.15  | 3.34 | 12 | MICROS   |
| rs10805346 | 4 | SLC2A9 | rs9321174  | 6 | ARHGAP18 | 11.87 | 3.74 | 53 | CROATIAN |
| rs13129697 | 4 | SLC2A9 | rs1980450  | 6 | LRRC16A  | 10.72 | 3.49 | 23 | MICROS   |
| rs6449213  | 4 | SLC2A9 | rs10498725 | 6 | LRRC16A  | 11.32 | 3.29 | 1  | MICROS   |
| rs1014290  | 4 | SLC2A9 | rs7748771  | 6 | LRRC16A  | 10.68 | 3.6  | 1  | MICROS   |
| rs1014290  | 4 | SLC2A9 | rs1980450  | 6 | LRRC16A  | 11.01 | 4.48 | 8  | MICROS   |
| rs733175   | 4 | SLC2A9 | rs7748771  | 6 | LRRC16A  | 7.45  | 3.32 | 1  | MICROS   |
| rs10805346 | 4 | SLC2A9 | rs441460   | 6 | LRRC16A  | 11.86 | 3.52 | 71 | CROATIAN |
| rs737267   | 4 | SLC2A9 | rs1105953  | 7 | AUTS2    | 11.76 | 3.61 | 18 | MICROS   |
| rs10805346 | 4 | SLC2A9 | rs2293496  | 7 | AUTS2    | 13.41 | 4.4  | 10 | CROATIAN |
| rs13129697 | 4 | SLC2A9 | rs2293496  | 7 | AUTS2    | 17.29 | 3.77 | 9  | CROATIAN |
| rs13131257 | 4 | SLC2A9 | rs2237526  | 7 | CACNA2D1 | 10.92 | 3.62 | 4  | MICROS   |
| rs1014290  | 4 | SLC2A9 | rs2237526  | 7 | CACNA2D1 | 10.74 | 3.58 | 3  | MICROS   |
| rs733175   | 4 | SLC2A9 | rs2299178  | 7 | CACNA2D1 | 7.25  | 3.27 | 3  | MICROS   |
| rs733175   | 4 | SLC2A9 | rs2237526  | 7 | CACNA2D1 | 7.53  | 3.38 | 3  | MICROS   |
| rs10805346 | 4 | SLC2A9 | rs258684   | 7 | CACNA2D1 | 11.87 | 3.41 | 71 | CROATIAN |
| rs13131257 | 4 | SLC2A9 | rs7809670  | 7 | CNTNAP2  | 11.89 | 3.3  | 1  | MICROS   |
| rs13129697 | 4 | SLC2A9 | rs2906300  | 7 | CNTNAP2  | 17.28 | 3.9  | 25 | CROATIAN |
| rs10805346 | 4 | SLC2A9 | rs160359   | 7 | CREB5    | 9.12  | 3.93 | 2  | MICROS   |
| rs737267   | 4 | SLC2A9 | rs849322   | 7 | CREB5    | 14.6  | 3.3  | 40 | CROATIAN |
| rs10805346 | 4 | SLC2A9 | rs17134567 | 7 | SDK1     | 8.77  | 3.4  | 26 | MICROS   |
| rs13129697 | 4 | SLC2A9 | rs4723454  | 7 | SDK1     | 12.7  | 4.76 | 13 | MICROS   |
| rs13129697 | 4 | SLC2A9 | rs17134567 | 7 | SDK1     | 10.83 | 3.29 | 10 | MICROS   |
| rs737267   | 4 | SLC2A9 | rs4723454  | 7 | SDK1     | 13.18 | 4.28 | 8  | MICROS   |
| rs737267   | 4 | SLC2A9 | rs17134567 | 7 | SDK1     | 12.41 | 3.99 | 7  | MICROS   |
| rs13131257 | 4 | SLC2A9 | rs17134567 | 7 | SDK1     | 10.74 | 3.51 | 5  | MICROS   |
| rs13129697 | 4 | SLC2A9 | rs17330921 | 7 | SDK1     | 17.22 | 3.96 | 9  | CROATIAN |
| rs6449213  | 4 | SLC2A9 | rs6979125  | 7 | THSD7A   | 10.41 | 3.45 | 1  | MICROS   |
| rs13131257 | 4 | SLC2A9 | rs6959645  | 7 | THSD7A   | 17.7  | 3.59 | 20 | CROATIAN |
| rs13131257 | 4 | SLC2A9 | rs7802386  | 7 | ZNF804B  | 10.96 | 3.96 | 3  | MICROS   |
| rs10805346 | 4 | SLC2A9 | rs1990020  | 7 | ZNF804B  | 11.67 | 3.4  | 26 | CROATIAN |
| rs13131257 | 4 | SLC2A9 | rs1809437  | 8 | CPA6     | 10.68 | 3.76 | 3  | MICROS   |
| rs4505821  | 4 | SLC2A9 | rs2128105  | 8 | CPA6     | 7     | 3.78 | 9  | CROATIAN |
| rs10805346 | 4 | SLC2A9 | rs2725043  | 8 | CSMD1    | 10.03 | 4.32 | 28 | MICROS   |
| rs13129697 | 4 | SLC2A9 | rs11783144 | 8 | CSMD1    | 11.44 | 3.71 | 8  | MICROS   |
| rs737267   | 4 | SLC2A9 | rs11783144 | 8 | CSMD1    | 11.91 | 3.3  | 3  | MICROS   |
| rs10805346 | 4 | SLC2A9 | rs17066956 | 8 | CSMD1    | 12.44 | 3.61 | 4  | CROATIAN |
| rs13129697 | 4 | SLC2A9 | rs2623633  | 8 | CSMD1    | 16.35 | 3.29 | 23 | CROATIAN |
| rs737267   | 4 | SLC2A9 | rs11987743 | 8 | CSMD1    | 15.55 | 3.35 | 20 | CROATIAN |
| rs737267   | 4 | SLC2A9 | rs2623633  | 8 | CSMD1    | 15.5  | 4.4  | 13 | CROATIAN |
| rs6449213  | 4 | SLC2A9 | rs10095133 | 8 | CSMD1    | 15.08 | 3.36 | 4  | CROATIAN |
| rs1014290  | 4 | SLC2A9 | rs6993971  | 8 | SAMD12   | 9.85  | 3.32 | 13 | MICROS   |
| rs733175   | 4 | SLC2A9 | rs6993971  | 8 | SAMD12   | 8.42  | 4.8  | 8  | MICROS   |
| rs13129697 | 4 | SLC2A9 | rs2450206  | 8 | SAMD12   | 17.06 | 3.98 | 9  | CROATIAN |
| rs1014290  | 4 | SLC2A9 | rs2450206  | 8 | SAMD12   | 15.99 | 3.61 | 5  | CROATIAN |
| rs733175   | 4 | SLC2A9 | rs2450206  | 8 | SAMD12   | 10.82 | 3.29 | 5  | CROATIAN |
| rs6449213  | 4 | SLC2A9 | rs4465021  | 9 | KDM4C    | 10.8  | 3.72 | 1  | MICROS   |

|            |   |        |            |    |        |       |      |    |          |
|------------|---|--------|------------|----|--------|-------|------|----|----------|
| rs737267   | 4 | SLC2A9 | rs17456897 | 9  | KDM4C  | 14.37 | 3.3  | 5  | CROATIAN |
| rs13131257 | 4 | SLC2A9 | rs668205   | 9  | PTPRD  | 11.47 | 3.71 | 19 | MICROS   |
| rs1014290  | 4 | SLC2A9 | rs10491914 | 9  | PTPRD  | 9.55  | 3.28 | 9  | MICROS   |
| rs1014290  | 4 | SLC2A9 | rs635580   | 9  | PTPRD  | 15.79 | 3.33 | 9  | CROATIAN |
| rs733175   | 4 | SLC2A9 | rs635580   | 9  | PTPRD  | 11.29 | 3.69 | 4  | CROATIAN |
| rs13129697 | 4 | SLC2A9 | rs4750440  | 10 | FRMD4A | 11.26 | 3.72 | 17 | MICROS   |
| rs733175   | 4 | SLC2A9 | rs2446581  | 10 | FRMD4A | 7.05  | 3.4  | 1  | MICROS   |
| rs737267   | 4 | SLC2A9 | rs1327000  | 10 | FRMD4A | 14.76 | 3.63 | 23 | CROATIAN |
| rs733175   | 4 | SLC2A9 | rs10793040 | 11 | ARAP1  | 7.1   | 3.37 | 5  | MICROS   |
| rs733175   | 4 | SLC2A9 | rs10793039 | 11 | ARAP1  | 11.12 | 3.41 | 19 | CROATIAN |
| rs2867394  | 4 | SLC2A9 | rs12281918 | 11 | FLI1   | 7.62  | 6.02 | 2  | MICROS   |
| rs1107710  | 4 | SLC2A9 | rs12281918 | 11 | FLI1   | 7.66  | 6.63 | 2  | MICROS   |
| rs737267   | 4 | SLC2A9 | rs12281918 | 11 | FLI1   | 12.83 | 3.43 | 1  | MICROS   |
| rs13129697 | 4 | SLC2A9 | rs2284786  | 11 | FLI1   | 17.82 | 3.34 | 34 | CROATIAN |
| rs737267   | 4 | SLC2A9 | rs2284786  | 11 | FLI1   | 15.68 | 3.43 | 24 | CROATIAN |
| rs6449213  | 4 | SLC2A9 | rs7971370  | 12 | GRIP1  | 10.98 | 3.35 | 1  | MICROS   |
| rs4505821  | 4 | SLC2A9 | rs4486703  | 12 | GRIP1  | 7.92  | 3.6  | 15 | CROATIAN |
| rs733175   | 4 | SLC2A9 | rs9556886  | 13 | FARP1  | 7.08  | 3.44 | 5  | MICROS   |
| rs10805346 | 4 | SLC2A9 | rs2390038  | 13 | FARP1  | 12.49 | 4.21 | 77 | CROATIAN |
| rs13129697 | 4 | SLC2A9 | rs536863   | 13 | FGF14  | 10.71 | 3.51 | 18 | MICROS   |
| rs737267   | 4 | SLC2A9 | rs4335654  | 13 | FGF14  | 11.79 | 3.3  | 1  | MICROS   |
| rs13131257 | 4 | SLC2A9 | rs7491329  | 13 | FGF14  | 11.07 | 4.13 | 1  | MICROS   |
| rs13129697 | 4 | SLC2A9 | rs649589   | 13 | FGF14  | 18.08 | 4.89 | 7  | CROATIAN |
| rs13129697 | 4 | SLC2A9 | rs784205   | 13 | FGF14  | 18.07 | 4.88 | 7  | CROATIAN |
| rs13129697 | 4 | SLC2A9 | rs1336703  | 13 | FGF14  | 18.42 | 5.29 | 7  | CROATIAN |
| rs13129697 | 4 | SLC2A9 | rs1415053  | 13 | FGF14  | 16.3  | 3.38 | 9  | CROATIAN |
| rs13129697 | 4 | SLC2A9 | rs7985526  | 13 | FGF14  | 16.44 | 3.41 | 9  | CROATIAN |
| rs13129697 | 4 | SLC2A9 | rs1928510  | 13 | FGF14  | 16.61 | 3.56 | 9  | CROATIAN |
| rs737267   | 4 | SLC2A9 | rs649589   | 13 | FGF14  | 14.68 | 3.52 | 5  | CROATIAN |
| rs737267   | 4 | SLC2A9 | rs784205   | 13 | FGF14  | 14.66 | 3.51 | 5  | CROATIAN |
| rs13131257 | 4 | SLC2A9 | rs649589   | 13 | FGF14  | 14.48 | 4.08 | 4  | CROATIAN |
| rs13131257 | 4 | SLC2A9 | rs784205   | 13 | FGF14  | 14.46 | 4.08 | 4  | CROATIAN |
| rs13131257 | 4 | SLC2A9 | rs1336714  | 13 | FGF14  | 15.19 | 3.79 | 10 | CROATIAN |
| rs6449213  | 4 | SLC2A9 | rs649589   | 13 | FGF14  | 16.37 | 4.66 | 4  | CROATIAN |
| rs6449213  | 4 | SLC2A9 | rs784205   | 13 | FGF14  | 16.35 | 4.66 | 4  | CROATIAN |
| rs1014290  | 4 | SLC2A9 | rs649589   | 13 | FGF14  | 18.21 | 5.7  | 5  | CROATIAN |
| rs1014290  | 4 | SLC2A9 | rs784205   | 13 | FGF14  | 18.19 | 5.7  | 5  | CROATIAN |
| rs1014290  | 4 | SLC2A9 | rs1336703  | 13 | FGF14  | 16.64 | 4.19 | 6  | CROATIAN |
| rs737267   | 4 | SLC2A9 | rs4085921  | 13 | GPC6   | 11.66 | 3.58 | 10 | MICROS   |
| rs733175   | 4 | SLC2A9 | rs7321299  | 13 | GPC6   | 7.3   | 3.33 | 9  | MICROS   |
| rs13129697 | 4 | SLC2A9 | rs10508009 | 13 | GPC6   | 16.55 | 3.39 | 20 | CROATIAN |
| rs737267   | 4 | SLC2A9 | rs1947078  | 13 | GPC6   | 15.1  | 3.88 | 25 | CROATIAN |
| rs737267   | 4 | SLC2A9 | rs7997642  | 13 | GPC6   | 15.02 | 3.65 | 19 | CROATIAN |
| rs737267   | 4 | SLC2A9 | rs4085921  | 13 | GPC6   | 15.02 | 3.99 | 14 | CROATIAN |
| rs737267   | 4 | SLC2A9 | rs10508009 | 13 | GPC6   | 15.22 | 4.2  | 12 | CROATIAN |
| rs737267   | 4 | SLC2A9 | rs9524163  | 13 | GPC6   | 14.96 | 3.98 | 13 | CROATIAN |
| rs737267   | 4 | SLC2A9 | rs4773754  | 13 | GPC6   | 15.34 | 4.18 | 14 | CROATIAN |
| rs737267   | 4 | SLC2A9 | rs9524175  | 13 | GPC6   | 15.62 | 4.35 | 11 | CROATIAN |
| rs733175   | 4 | SLC2A9 | rs1326132  | 13 | MIPEP  | 7.26  | 3.36 | 2  | MICROS   |
| rs13131257 | 4 | SLC2A9 | rs1536299  | 13 | MIPEP  | 14.25 | 3.56 | 7  | CROATIAN |

|            |   |        |            |    |         |       |      |    |          |
|------------|---|--------|------------|----|---------|-------|------|----|----------|
| rs733175   | 4 | SLC2A9 | rs1861087  | 14 | FBLN5   | 7.5   | 3.56 | 2  | MICROS   |
| rs13131257 | 4 | SLC2A9 | rs2246416  | 14 | FBLN5   | 13.63 | 3.36 | 17 | CROATIAN |
| rs733175   | 4 | SLC2A9 | rs7162000  | 15 | SCG5    | 7.59  | 3.48 | 3  | MICROS   |
| rs10805346 | 4 | SLC2A9 | rs1406387  | 15 | SCG5    | 11.96 | 3.44 | 60 | CROATIAN |
| rs1014290  | 4 | SLC2A9 | rs3859084  | 16 | CDH13   | 10.26 | 3.41 | 8  | MICROS   |
| rs13129697 | 4 | SLC2A9 | rs10514554 | 16 | CDH13   | 17.31 | 3.72 | 1  | CROATIAN |
| rs13129697 | 4 | SLC2A9 | rs4421965  | 16 | CDH13   | 16.75 | 3.54 | 23 | CROATIAN |
| rs737267   | 4 | SLC2A9 | rs10514554 | 16 | CDH13   | 14.91 | 3.47 | 1  | CROATIAN |
| rs13131257 | 4 | SLC2A9 | rs1870846  | 16 | CDH13   | 13.64 | 3.81 | 1  | CROATIAN |
| rs13131257 | 4 | SLC2A9 | rs10514554 | 16 | CDH13   | 14.28 | 3.53 | 1  | CROATIAN |
| rs13131257 | 4 | SLC2A9 | rs8055389  | 16 | CDH13   | 14.48 | 3.87 | 2  | CROATIAN |
| rs1014290  | 4 | SLC2A9 | rs7499717  | 16 | CDH13   | 16.33 | 3.41 | 4  | CROATIAN |
| rs13129697 | 4 | SLC2A9 | rs8059260  | 16 | CLEC16A | 10.75 | 3.28 | 1  | MICROS   |
| rs13129697 | 4 | SLC2A9 | rs2302558  | 16 | CLEC16A | 10.84 | 3.44 | 1  | MICROS   |
| rs13129697 | 4 | SLC2A9 | rs7197758  | 16 | CLEC16A | 11.01 | 3.28 | 1  | MICROS   |
| rs737267   | 4 | SLC2A9 | rs2302558  | 16 | CLEC16A | 11.66 | 3.44 | 1  | MICROS   |
| rs13131257 | 4 | SLC2A9 | rs2302558  | 16 | CLEC16A | 10.56 | 3.49 | 1  | MICROS   |
| rs6449213  | 4 | SLC2A9 | rs8059260  | 16 | CLEC16A | 11.17 | 3.83 | 1  | MICROS   |
| rs6449213  | 4 | SLC2A9 | rs2302558  | 16 | CLEC16A | 11.25 | 3.94 | 1  | MICROS   |
| rs6449213  | 4 | SLC2A9 | rs8055893  | 16 | CLEC16A | 10.95 | 3.61 | 1  | MICROS   |
| rs1014290  | 4 | SLC2A9 | rs8059260  | 16 | CLEC16A | 10.23 | 3.33 | 1  | MICROS   |
| rs1014290  | 4 | SLC2A9 | rs2302558  | 16 | CLEC16A | 10.44 | 3.57 | 1  | MICROS   |
| rs1014290  | 4 | SLC2A9 | rs8055893  | 16 | CLEC16A | 10.3  | 3.39 | 1  | MICROS   |
| rs1014290  | 4 | SLC2A9 | rs1003603  | 16 | CLEC16A | 10.84 | 4.27 | 16 | MICROS   |
| rs1014290  | 4 | SLC2A9 | rs3901386  | 16 | CLEC16A | 11.05 | 4.43 | 16 | MICROS   |
| rs1014290  | 4 | SLC2A9 | rs725613   | 16 | CLEC16A | 10.71 | 4.14 | 13 | MICROS   |
| rs1014290  | 4 | SLC2A9 | rs998592   | 16 | CLEC16A | 10.89 | 4.05 | 15 | MICROS   |
| rs733175   | 4 | SLC2A9 | rs1003603  | 16 | CLEC16A | 7.13  | 3.48 | 11 | MICROS   |
| rs733175   | 4 | SLC2A9 | rs3901386  | 16 | CLEC16A | 7.1   | 3.4  | 11 | MICROS   |
| rs733175   | 4 | SLC2A9 | rs725613   | 16 | CLEC16A | 7.87  | 4.25 | 10 | MICROS   |
| rs733175   | 4 | SLC2A9 | rs2041670  | 16 | CLEC16A | 7.5   | 3.57 | 9  | MICROS   |
| rs737267   | 4 | SLC2A9 | rs8059260  | 16 | CLEC16A | 15.11 | 3.83 | 4  | CROATIAN |
| rs737267   | 4 | SLC2A9 | rs2302558  | 16 | CLEC16A | 14.99 | 3.96 | 3  | CROATIAN |
| rs737267   | 4 | SLC2A9 | rs8055893  | 16 | CLEC16A | 14.32 | 3.45 | 2  | CROATIAN |
| rs737267   | 4 | SLC2A9 | rs9940096  | 16 | CLEC16A | 15.14 | 4.2  | 2  | CROATIAN |
| rs737267   | 4 | SLC2A9 | rs741176   | 16 | CLEC16A | 15.56 | 4.5  | 2  | CROATIAN |
| rs13131257 | 4 | SLC2A9 | rs1347591  | 16 | NUP93   | 11.1  | 4.26 | 7  | MICROS   |
| rs6449213  | 4 | SLC2A9 | rs1347591  | 16 | NUP93   | 10.51 | 3.33 | 3  | MICROS   |
| rs4505821  | 4 | SLC2A9 | rs12149031 | 16 | NUP93   | 7.2   | 3.46 | 3  | CROATIAN |
| rs13129697 | 4 | SLC2A9 | rs10502421 | 18 | C18orf1 | 12.18 | 3.52 | 1  | MICROS   |
| rs737267   | 4 | SLC2A9 | rs2042743  | 18 | C18orf1 | 11.99 | 3.34 | 14 | MICROS   |
| rs6449213  | 4 | SLC2A9 | rs2042743  | 18 | C18orf1 | 11.01 | 3.55 | 6  | MICROS   |
| rs1014290  | 4 | SLC2A9 | rs1540080  | 18 | C18orf1 | 16.61 | 3.59 | 10 | CROATIAN |
| rs1014290  | 4 | SLC2A9 | rs10775489 | 18 | DYM     | 10.35 | 3.45 | 3  | MICROS   |
| rs1014290  | 4 | SLC2A9 | rs1838962  | 18 | DYM     | 10.29 | 3.3  | 4  | MICROS   |
| rs1014290  | 4 | SLC2A9 | rs1893528  | 18 | DYM     | 10.24 | 3.4  | 4  | MICROS   |
| rs1014290  | 4 | SLC2A9 | rs4939846  | 18 | DYM     | 10.72 | 3.9  | 3  | MICROS   |
| rs1014290  | 4 | SLC2A9 | rs498929   | 18 | DYM     | 10.39 | 3.78 | 4  | MICROS   |
| rs1014290  | 4 | SLC2A9 | rs478682   | 18 | DYM     | 10.14 | 3.49 | 5  | MICROS   |
| rs733175   | 4 | SLC2A9 | rs1838962  | 18 | DYM     | 7.73  | 3.65 | 2  | MICROS   |

|            |   |        |            |    |        |       |      |    |          |
|------------|---|--------|------------|----|--------|-------|------|----|----------|
| rs733175   | 4 | SLC2A9 | rs1893528  | 18 | DYM    | 7.39  | 3.52 | 2  | MICROS   |
| rs733175   | 4 | SLC2A9 | rs4939846  | 18 | DYM    | 7.47  | 3.61 | 2  | MICROS   |
| rs733175   | 4 | SLC2A9 | rs498929   | 18 | DYM    | 7.73  | 4.04 | 3  | MICROS   |
| rs10805346 | 4 | SLC2A9 | rs9964222  | 18 | DYM    | 11.51 | 3.34 | 3  | CROATIAN |
| rs10805346 | 4 | SLC2A9 | rs16950548 | 18 | DYM    | 11.54 | 3.34 | 3  | CROATIAN |
| rs13129697 | 4 | SLC2A9 | rs355331   | 18 | INO80C | 10.75 | 3.37 | 11 | MICROS   |
| rs13129697 | 4 | SLC2A9 | rs355338   | 18 | INO80C | 10.77 | 3.45 | 11 | MICROS   |
| rs737267   | 4 | SLC2A9 | rs3786394  | 18 | INO80C | 15.19 | 4.04 | 1  | CROATIAN |
| rs2867394  | 4 | SLC2A9 | rs1861906  | 18 | WDR7   | 7.07  | 4.42 | 5  | MICROS   |
| rs13129697 | 4 | SLC2A9 | rs2278495  | 18 | WDR7   | 10.95 | 3.38 | 1  | MICROS   |
| rs13129697 | 4 | SLC2A9 | rs1370215  | 18 | WDR7   | 10.92 | 3.3  | 1  | MICROS   |
| rs733175   | 4 | SLC2A9 | rs9946253  | 18 | WDR7   | 11.28 | 3.68 | 2  | CROATIAN |
| rs733175   | 4 | SLC2A9 | rs1437073  | 18 | WDR7   | 11.18 | 3.5  | 3  | CROATIAN |
| rs733175   | 4 | SLC2A9 | rs2083020  | 18 | WDR7   | 11.17 | 3.53 | 3  | CROATIAN |
| rs1014290  | 4 | SLC2A9 | rs9976793  | 21 | DSCAM  | 10.74 | 3.95 | 3  | MICROS   |
| rs1014290  | 4 | SLC2A9 | rs909185   | 21 | DSCAM  | 10.39 | 3.69 | 4  | MICROS   |
| rs733175   | 4 | SLC2A9 | rs9976793  | 21 | DSCAM  | 7.67  | 3.84 | 3  | MICROS   |
| rs733175   | 4 | SLC2A9 | rs909185   | 21 | DSCAM  | 7.65  | 3.9  | 3  | MICROS   |
| rs10805346 | 4 | SLC2A9 | rs2837381  | 21 | DSCAM  | 12.12 | 3.31 | 73 | CROATIAN |
| rs733175   | 4 | SLC2A9 | rs2822636  | 21 | HSPA13 | 7.48  | 3.57 | 2  | MICROS   |
| rs13129697 | 4 | SLC2A9 | rs2205254  | 21 | HSPA13 | 16.52 | 3.52 | 7  | CROATIAN |
| rs737267   | 4 | SLC2A9 | rs3747208  | 22 | PARVG  | 11.18 | 3.37 | 1  | MICROS   |
| rs4447863  | 4 | SLC2A9 | rs139210   | 22 | PARVG  | 7.18  | 4.15 | 33 | CROATIAN |
| rs1014290  | 4 | SLC2A9 | rs713745   | 22 | SEZ6L  | 10.26 | 3.53 | 7  | MICROS   |
| rs733175   | 4 | SLC2A9 | rs5761435  | 22 | SEZ6L  | 7.36  | 3.47 | 4  | MICROS   |
| rs733175   | 4 | SLC2A9 | rs2073258  | 22 | SEZ6L  | 8.6   | 4.98 | 3  | MICROS   |
| rs733175   | 4 | SLC2A9 | rs713745   | 22 | SEZ6L  | 8.85  | 5.18 | 4  | MICROS   |
| rs733175   | 4 | SLC2A9 | rs137180   | 22 | SEZ6L  | 10.09 | 6.58 | 4  | MICROS   |
| rs737267   | 4 | SLC2A9 | rs1941126  | 22 | SEZ6L  | 14.43 | 3.74 | 21 | CROATIAN |
| rs737267   | 4 | SLC2A9 | rs4822711  | 22 | SEZ6L  | 14.83 | 3.82 | 21 | CROATIAN |

SNP<sub>1</sub> (SNP<sub>2</sub>): the first (second) SNP name;

chr<sub>1</sub> (chr<sub>2</sub>): the chromosome where SNP<sub>1</sub> (SNP<sub>2</sub>) locates

gene<sub>1</sub> (gene<sub>2</sub>): symbol of the gene annotated by SNP<sub>1</sub> (SNP<sub>2</sub>);

P<sub>pair</sub>: -log<sub>10</sub> P value of the whole pair test;

P<sub>int</sub>: -log<sub>10</sub> P value of the interaction test;

MGC: count of number of individuals in the minor joint genotype class

Epistatic pairs replicated at the SNP level are highlighted in red

Epistatic pairs involving two shared genes are colored in orange
